# Supplementary material
Source: PubMed Central journal article supplement (PMC1142570)
Supplement: 7600634s1.pdf [file 7600634s1.pdf]

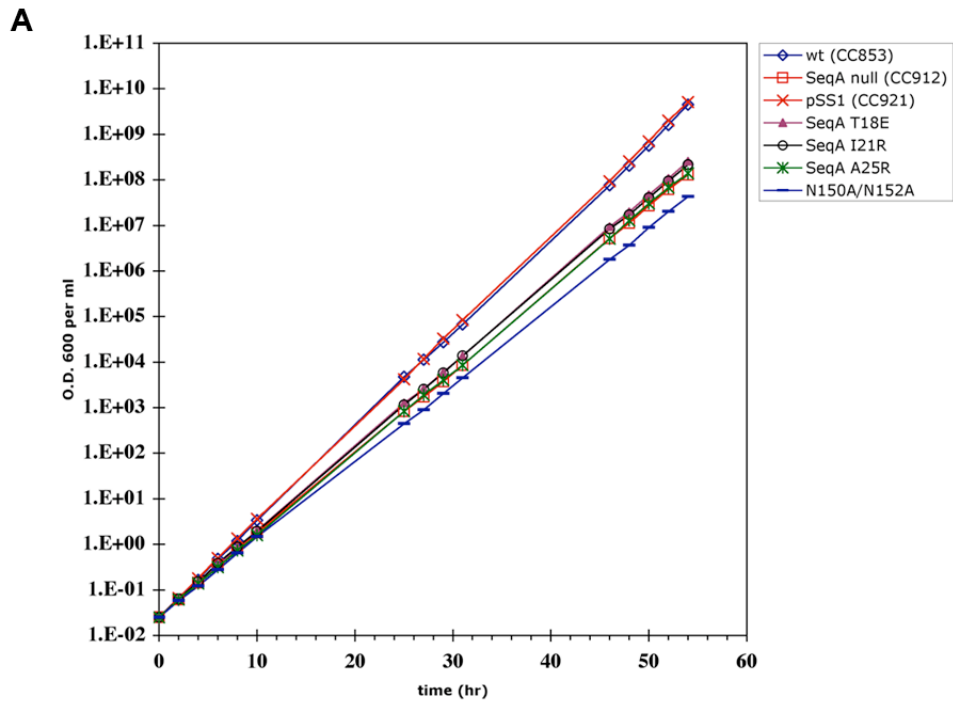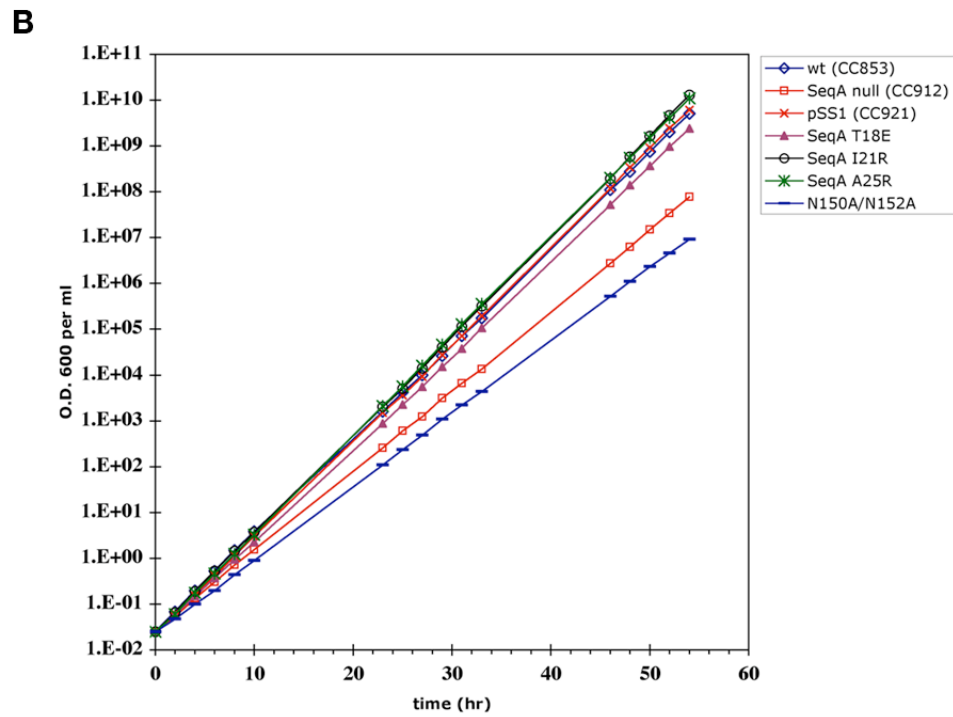

**Legend:** Growth curves of the wild type, *seqA null* and *seqA null* complemented with pET11a plasmids encoding SeqA-wt or various SeqA mutants. **(A)** Growth curves in the absence of IPTG. **(B)** Growth curves in the presence of 25  $\mu$ M IPTG.
